# Supplementary material for: Population-Based Childhood Overweight Prevention: Outcomes of the ‘Be Active, Eat Right’ Study
Source: PLOS journal article supplement (doi:10.1371/journal.pone.0065376), 2013-05-31

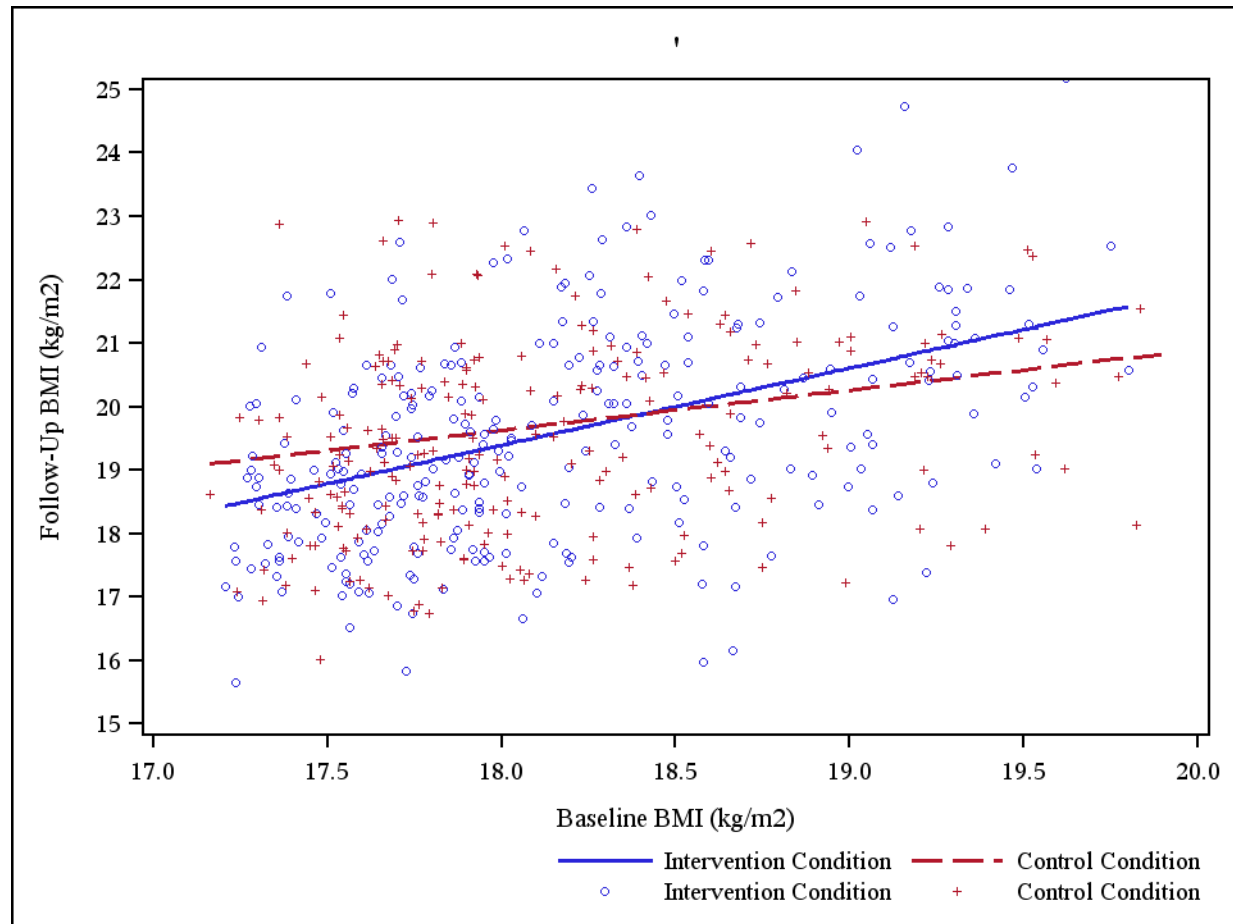

Supplement: S2 (10.1371/journal.pone.0065376.s002) [file journal.pone.0065376.s002]
